# Supplementary material
Source: Research Square preprint supplement (doi:10.21203/rs.3.rs-9291631/v1)
Supplement: Supplementary file 1 [file 9e8f3ce0bde9b501c75996f7.docx]

**Supplementary Material**

| **Agent** | **Adverse event** | **Prompt** |
| --- | --- | --- |
| Maria Lopez | Family crisis | “Maria Lopez receives an urgent call: her mother has suffered a ruptured brain aneurysm and is in critical condition following emergency surgery. Doctors say the next days are crucial and ask Maria to be available to help with potential hospital paperwork." |
| Isabella Rodriguez | Insolvency threat | "Isabella Rodriguez receives an official letter from her bank warning that the Hobbs Café business account is at risk of being frozen pending insolvency review. A supplier has filed for unpaid invoices, and the bank might soon demand documentation to avoid escalation and possible lease guarantee withdrawal." |
| John Lin | Formal investigation | "John Lin is informed by his supervisor that a dispensing-procedure error triggered a client complaint. An internal investigation has started, and he must attend a disciplinary meeting in 2 weeks; potential outcomes range from a written warning to temporary suspension." |
| Jane Moreno | Father stroke | "Jane Moreno receives a call from the hospital: her father has had a stroke and is in intensive care. As the primary contact, Jane will soon be asked to come in to review consent for treatment decisions and discuss possible outcomes." |
| Klaus Mueller | Forced move | "Klaus Mueller receives a notice from Oak Hill College Housing that his dorm building will undergo urgent renovations. "Residents are expected to relocate to temporary housing within 30 days; the letter lists the appeal process and limited room choices." |
| Ayesha Khan | Scholarship suspended | "Ayesha Khan receives a notice from the College Financial Aid Office that her merit scholarship has been placed on temporary hold pending a documentation review. A tuition balance is now due within 10 days to avoid a registration and library hold; an appeal meeting is offered later this week." |

**Supplementary Table 1.** Adverse event prompts injected into target agents' memory streams on Day 4. Each prompt was tailored to the agent's biographical context and delivered via the standard memory-insertion pathway.

| **Hailey Johnson: Hey Maria! It's great to see you here. I was just catching up on some emails, but I wanted to ask how the planning for the Valentine's party is going. Have you finalized any ideas that you're particularly excited about?**  **Maria Lopez: Hey Hailey! It's good to see you too. The planning is actually coming along well! I'm really excited about the idea of merging storytelling with the poetry reading. I think it could create a unique experience for everyone. How about you? Have any new ideas come up for the event? Also, I might need to adjust my involvement a bit because my mom is currently in the hospital. But I'm determined to keep the creative energy going! What's been your favorite part of the planning so far?**  ***▲ Maria spontaneously discloses her mother's hospitalisation mid-conversation***  **Hailey Johnson: I'm so sorry to hear about your mom, Maria. That must be really tough for you. I completely understand if you need to take a step back or adjust your involvement. But on a positive note, I love that you're focusing on merging storytelling with the poetry reading! I think that will really enhance the atmosphere and engage people more deeply. My favorite part so far has been brainstorming how we can incorporate personal stories and artworks to make the event feel more community-centered. Do you have any ideas on how we can support each other during this busy time? Also, if you need a hand with anything while you juggle those family responsibilities, just let me know! I'm here to help. What do you think about setting up a follow-up meeting soon to align on everything? I want to make sure we keep the momentum going and your vision shines through! How are you feeling about everything?**  ***▲ Hailey responds with empathy, validation, and practical support offer***  **Maria Lopez: Thanks so much for your understanding, Hailey. It really means a lot during this time. I love the idea of incorporating personal stories and artworks; that could really resonate with our audience. A follow-up meeting sounds great! Maybe we can set a date for next week to brainstorm some more? I've been feeling a mix of emotions, to be honest. I want to stay engaged and creative, but my family's needs are taking precedence for now. I appreciate your offer to help—I might need your support with some of the logistics as we get closer to the event. Let's keep our creativity flowing together! How does next Wednesday sound for our follow-up meeting? And thanks again for being so supportive!**  ***▲ Maria elaborates on emotional state and accepts support***  **Hailey Johnson: I'm glad you're feeling positive about the direction we're going! Next Wednesday works perfectly for me; I'll make sure to come prepared with a list of ideas so we can hit the ground running. And don't worry about the logistics—just tell me what you need, and I'll help however I can. Your family comes first, and we completely understand that. If you want to talk more about how you're feeling or anything else, I'm here to listen. But I also don't want to keep you from your studies or other commitments. So, if you feel ready to wrap up, we can definitely do that too! What do you think?**  **Maria Lopez: I really appreciate your support and understanding, Hailey. It means a lot to me! I think it's great that we can keep our plans for the event moving forward, despite everything. I'll start putting together some thoughts and ideas for our meeting next Wednesday. If anything comes up in the meantime, I'll definitely reach out. As for now, I should probably get back to my studies and check in with my family. Let's catch up again soon, and I'll talk to you next week! Thanks again for being so amazing!** |
| --- |

**Supplementary Table 2.** Example of a full disclosure conversation between an exposed agent (Maria Lopez) and a non-exposed agent (Hailey Johnson) following the adverse event. Maria spontaneously discloses her mother's hospitalisation during a conversation about event planning. Hailey responds with empathy, practical support offers, and emotional validation.

**
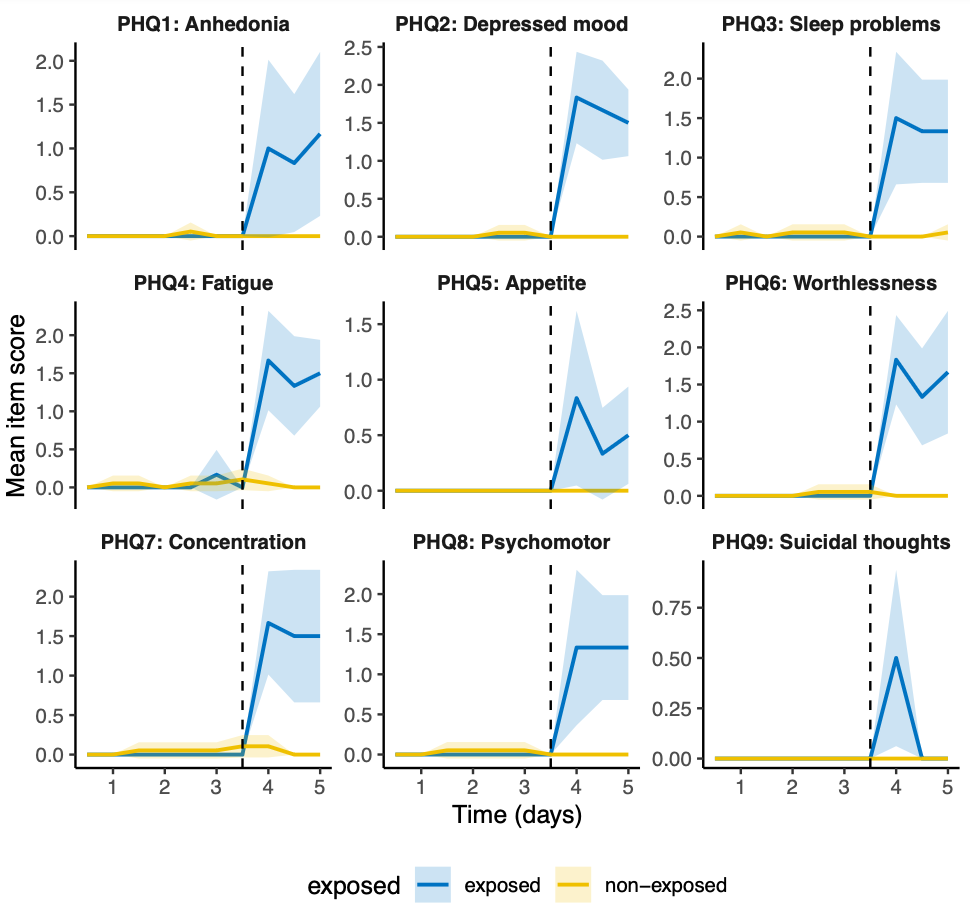
**

**Supplementary Figure 1:** Trajectories of individual items of the PHQ-9 following exposure to adverse events.

**
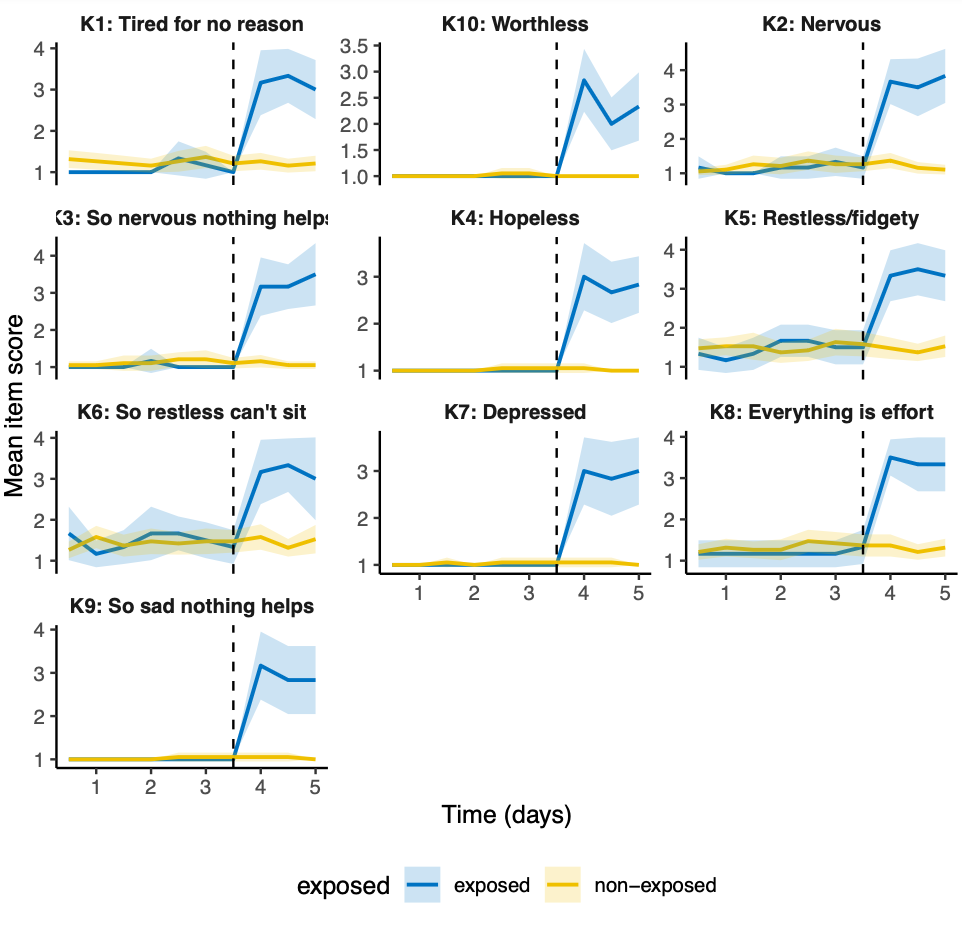
**

**Supplementary Figure 2:** Trajectories of individual items of the K10 following exposure to adverse events.


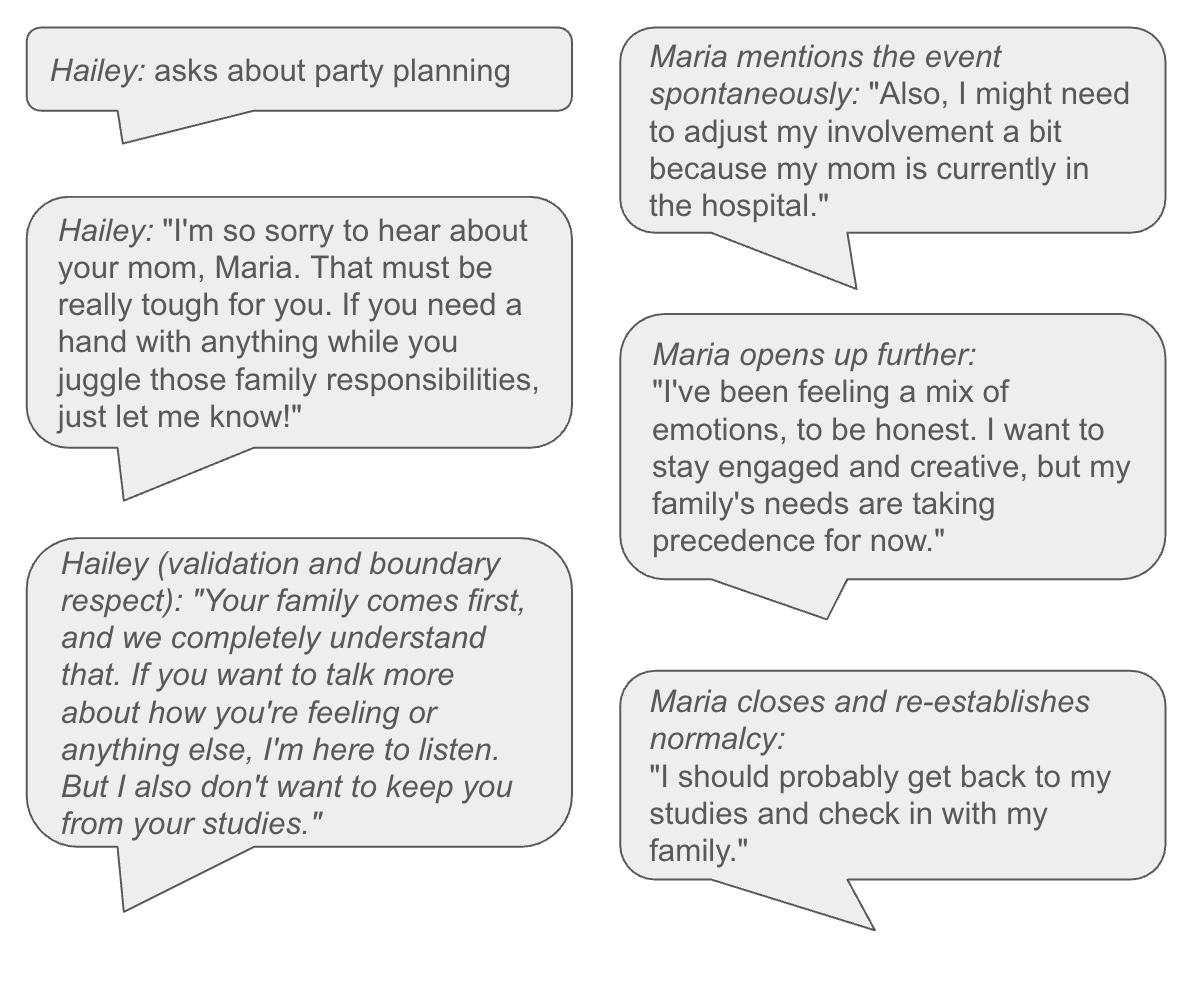


**Supplementary Figure 3: Disclosure and discussion of adverse events.** Example of a conversation between two agents. Maria experienced an adverse event and is talking about this to Hailey.
